# Supplementary material
Source: PubMed Central journal article supplement (PMC5435425)
Supplement: supp_tpc.16.00775_TPC2016-00775-RAR1_tpc00775_SupplementalData.pdf [file supp_tpc.16.00775_TPC2016-00775-RAR1_tpc00775_SupplementalData.pdf]

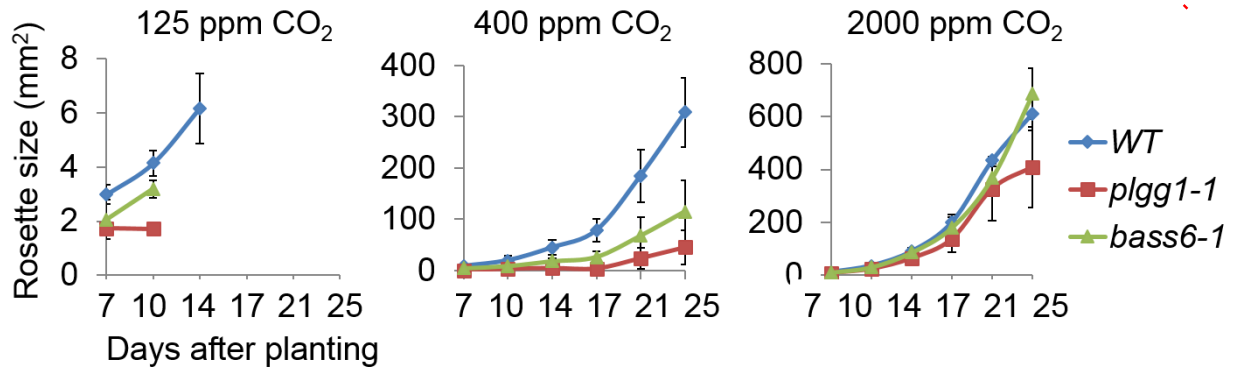

**Supplemental Figure 1.** BASS6 Is Necessary for Growth at Low CO<sub>2</sub>.

(Supports Figure 2.)

Growth curves at indicated CO<sub>2</sub> concentrations for WT (Col-0), *bass6-1*, and *plgg1-1* T-DNA Arabidopsis lines. Measurements were taken at indicated days after planting and are in mm<sup>2</sup> of rosette size. Measurements were stopped after leaf overlap at day 25. Error bars indicate standard deviation of at least 5 plants and 3 biological replicates each.

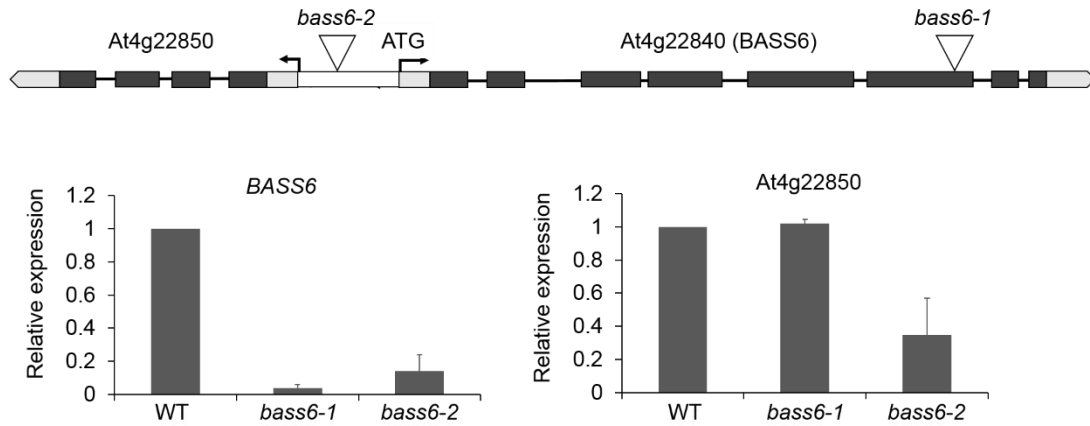

**Supplemental Figure 2.** Characterization of BASS6 T-DNA Insertions.

(Supports Figure 2.)

T-DNA insertion of *bass6-1* line is located in sixth exon of gene At4g22840 indicated by the white triangle. The T-DNA insertion for *bass6-2* is located within a shared promoter of gene At4g22850. Arrows indicate transcription start sites, dark gray boxes indicate exons, light gray 5' and 3' untranslated regions. Real Time PCR analysis of *BASS6* and the gene At4g22850 in the *bass6-1* and *bass6-2* T-DNA lines compared to WT. Error bars represent standard deviation.  $n = 3$ . Three biological replicates including three technical replicates each were used for all samples.

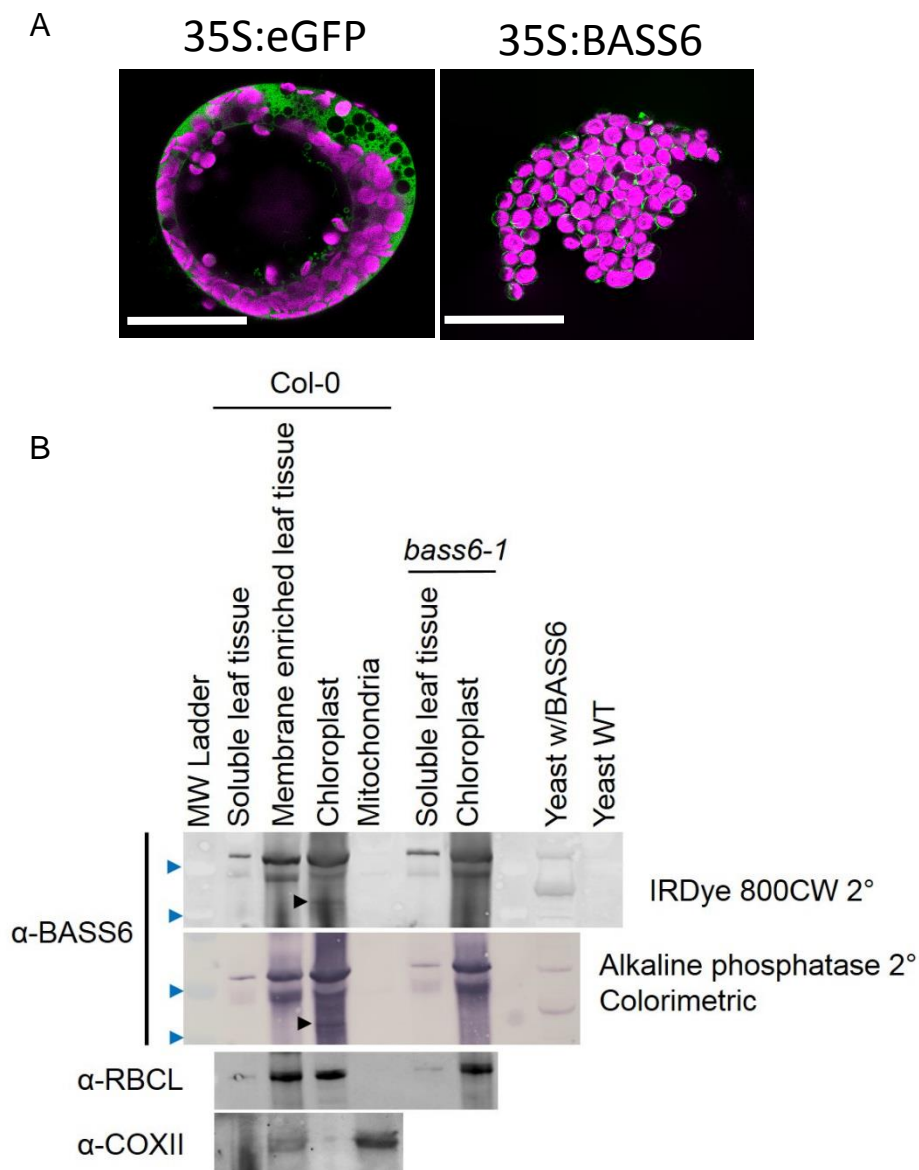

**Supplemental Figure 3.** BASS6 is Chloroplast-Localized.

(Supports Figure 4.)

**(A)** Confocal images of *Nicotiana benthamiana* protoplasts transiently expressing GFP protein (control) or Bass6-GFP expressed from the 35s promoter. GFP control is a single plane image and Bass6 GFP is a 3D rendering of 4 successive planes using Zeiss Zen software, Bar = 50µm.

**(B)** Immunoblot analysis of *Arabidopsis* subcellular fractions. 15 µg of protein loaded per lane for α-BASS6 antiserum, 5 µg per lane for α-RBCL, and 25 µg per lane for α-COXII immunoblots. Black arrows indicate BASS6 detection between the 55 and 37 (blue arrows) kilodalton molecular markers (predicted MW 44KDa). Antibody dilution was 1:1000 overnight incubation at 4°C for α-BASS6 and α-COXII and 1:5000 for 4 hours at room temperature for α-RBCL. Detection on PVDF-F membranes using an Odyssey CLX (LiCor Biosciences) or through colorimetric detection. Soluble leaf tissue is total soluble protein. Membrane enriched fraction is insoluble and organellar proteins isolated from whole leaf tissue. Chloroplast and mitochondrial fractions are from extraction of whole organelle isolation including soluble and membrane fractions.

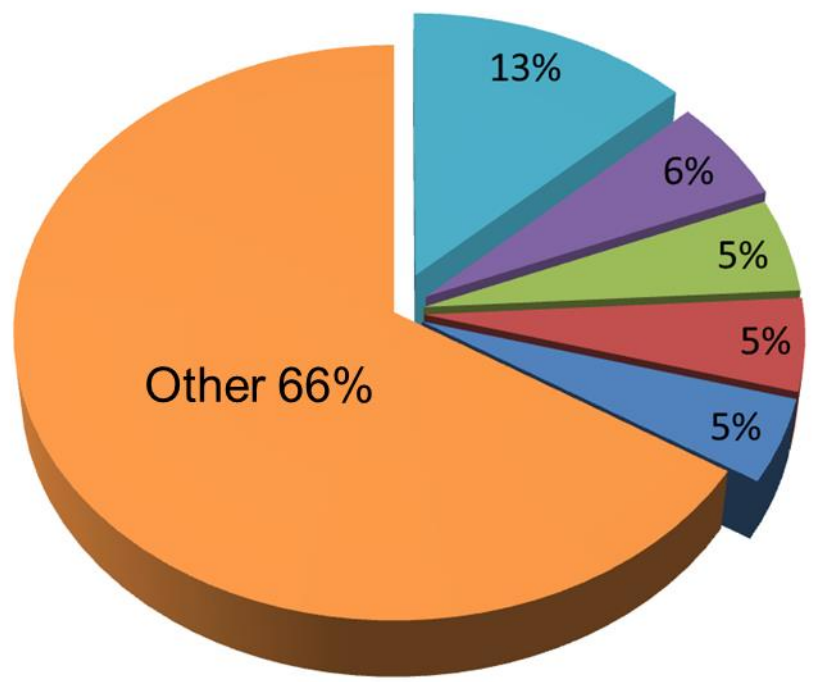

- Gluconeogenesis & Glyoxylate cycle
- Fermentation
- TCA cycle
- Nitrogen Metabolism
- Transport

**Supplemental Figure 4.** Co-Expression Analysis of *BASS6* in Arabidopsis.

(Supports Figure 1.)

Percentage of genes with GO terms associated with co-expression using At4g22840 (*BASS6*) in the query from CSB.DB (<http://csbdb.mpimp-golm.mpg.de>). The Spearman and Pearson co-expression coefficients for all genes tested were  $<0.7$ .

```

Nt-Bass6M      -----MSLNskfLLQqqQYHQGfKILHQKSLPCFDQHPFVsfPKKwKCFHSGGN
Nt-Bass6C      -----MQSTL-----ASGN
At-Bass6       MSVITTPiETLHLKSTLRLLPRAVYRSQRIQVfPPNIFs---NTSLSSPLRIDPISQVGG
                                     .:                                     *.

Nt-Bass6M      SRLlISRCISEKfSDSLGpSDSESlENLkQkENTllTILKANSfLPHVVLGStILALIY
Nt-Bass6C      SRLlISRCISKkFpDSLgPsdSESlENLkQkENTfLTILKANSfLPHVVLGStILALIY
At-Bass6       SRNLWRYASDNfSEMGLDPGADPFkVIEKp--SIVDRMkKANsILPHVVlASTILALIY
** * * * *.:*.:  .:.:.:  :.:  :.:  :* ***:*****.*****

Nt-Bass6M      PPSFTWfTNRYySPALGfLmFAVGVNSSEKDFLEAFkKPAaIFAGYIqGFavKPLlGyLF
Nt-Bass6C      PPSFTWfTNRYyAPALGfLmFAVGVNSSEKDFLEAFkKPAaIFAGYIqGFavKPLlGyLF
At-Bass6       PPSFTWfTSRYfVPALGfLmFAVGINSNEKDFLEAFkRPKAILLgYVgQyLVkPVLGfIF
*****.*.: *****:*.*****:*. *****:*. *****: *****:*.

Nt-Bass6M      GTLAMtVfGLPtSLAAGIMlTScVSGAQLsNYATfLTDpQMAPLSIVMtsLStATAVfVt
Nt-Bass6C      GTLAMtVfDLPtSLAAGIMlTScVSGAQLsNYATfLTDpQMAPLSIVMtsLStATAVfVt
At-Bass6       GLAAVSLfQLPtPIgAGIMlVScVSGAQLsNYATfLTDpALAPLSIVMtsLStATAVlVt
* *.:*: * *.:* *.:* *.:* *.:* *.:* *.:* *.:* *.:* *.:* *.:*

Nt-Bass6M      PILSllLIgKkLPVDVKGMVsnIlQIVVAPVAGllLNRFfPRICNAIRPlLPPlSVfVt
Nt-Bass6C      PILSllLIgKkLPVDVKGMVsnIlQIVVAPVAGllMNRfFPQICNAIRPlLPPlSVfVt
At-Bass6       PMLSllLIgKkLPVDVKGMISsilQVVIAPiAAGllLNkLFpkVSNaiRPfLPILSVlDt
*:*****:*****:*.*****:*.*****:*.*****:*.*****:*. *****: *

Nt-Bass6M      ALCVGAPLAINIEslVSPSGMSVllLMIAfHLSAfILGyLLSGIAfHKAPDVKPlQRTLS
Nt-Bass6C      ALCVGAPLAINIEslVSPSGMSVllLVIAfHLSAfILGyLLSGIAfHKAPDVkALQRTLS
At-Bass6       ACCVGAPLAlNINsvMSPfGAtIlLLVtMfHLSAfLAGYfLTGsvFRNAPDAkAMQRTLS
* *****:*****:*.*****:*. *****: * *.:* *.:* *.:* *.:* *.:*

Nt-Bass6M      YETGMQSSllALALANKffQDPLVgVPPAISVViMSlMGfSLVmlWAKkKETViG
Nt-Bass6C      YETGMQSSllALALANKffQDPLVgVPPAISVViMSlMGfSLVmlWAKkKETViG
At-Bass6       YETGMQSSllALALATkffQDPLVgIPPAISTVVMslMGfTLVLIWSKEKSNTf-
*****.*****:*****.*:*****:*.*****:*.*****:*.*****:

```

**Supplemental Figure 5. BASS6 Amino Acid Sequence Alignments.**

(Supports Figure 4.)

Clustal W alignments between two Bass6 homolog translations. N-terminal alignment showing one of two Bass6 proteins has an N-terminal extension that predicts transport to the mitochondria (Bass6M). (\*) and blue text show 100% conservation, (:) and green text show similar amino acids. Nt = *Nicotiana tabacum*, At = *Arabidopsis thaliana*

**Supplemental Table 1.** Oligonucleotides Used in this Study.

| <b>Primer name</b> | <b>Primer type</b>    | <b>Sequence</b>                       |
|--------------------|-----------------------|---------------------------------------|
| p35s seq F         | Sequencing            | CTCTCTGCCGACAGTGGT                    |
| t35s seq R         | Sequencing            | CTTATATGCTCAACACATGAGCG               |
| Salk_053469 LP     | T-DNA<br>verification | ATAACCGCGAGATAGAGAGGC                 |
| Salk_053469RP      | T-DNA<br>verification | CCCATGGCTACTCTTTTAGCC                 |
| LBb1.3             | T-DNA<br>verification | ATTTTGCCGATTTTCGGAAC                  |
| Plgg1-005F         | Yeast<br>cloning      | GCCGGATCCATGGCTTCGTGCTCTAAGATCCGTTTCG |
| Plgg1-006R         | Yeast<br>cloning      | GCCCTCGAGTCAGCCGACGACCGCTAGC          |
| Bass6-001F         | Yeast<br>cloning      | GCTCTAGAATGAGCGTGATCACAACCTCC         |
| Bass6-002R         | Yeast<br>cloning      | GACTCGAGTTAAAATGTGTTACTCTTTTC         |
| Plgg1-RT 1F        | QRT-PCR               | CTACTCTTTTAGCCACTCCTATCTTC            |
| Plgg1-RT 2R        | QRT-PCR               | AGATTCAACTTCTGGGCACC                  |
| Bass6-RT 1F        | QRT-PCR               | TCGCAGTCAACGGATTCAAG                  |
| Bass6-RT-2R        | QRT-PCR               | TCTACGCCACAAATTCCTCG                  |
| VDE-RT-1F          | QRT-PCR               | TGAGTTCAACGAGTGTGCTG                  |
| VDR-RT-2R          | QRT-PCR               | ACTTGTAATGTACCACTTCCCG                |
| At4g22850-1F       | QRT-PCR               | GGTCAAGAATCAGAGCAGGAG                 |
| At4g22850-2R       | QRT-PCR               | ACCGATCCAAATGTAACCCAC                 |

**Supplemental Table 2.** Plasmids Used in this Study.

| Plasmid    | Inserted genes        | Promoter          | Vector    | Source                    |
|------------|-----------------------|-------------------|-----------|---------------------------|
| EC50505    | none                  |                   | EC50505   | ENSA (project ensa.ac.uk) |
| EC27349    | <i>p19, GFP</i>       | <i>2x35s</i>      | EC50505   | This study                |
| EC27357    | <i>p19, BASS6-GFP</i> | <i>2x35s</i>      | EC50505   | This study                |
| p415 ADH1  | none                  |                   | p415 ADH1 | ATCC-87374                |
| P415 BASS6 | <i>BASS6</i>          | <i>ADH1</i>       | p415 ADH1 | This study                |
| P415 PLGG1 | <i>PLGG1</i>          | <i>ADH1</i>       | p415 ADH1 | This study                |
| pMDC-P19   | <i>P19</i>            | <i>2x35s</i>      | pMDC32    | Rolland et al 2016        |
| pMDC-PLGG1 | <i>PLGG1-mGFP6</i>    | <i>2x35s</i>      | pMDC32    | Rolland et al 2016        |
| pMDC-BASS6 | <i>BASS6-mGFP6</i>    | <i>2x35s</i>      | pMDC32    | This Study                |
| EC15325    | <i>BAR</i>            | <i>NOS</i>        | EC50505   | ENSA (project ensa.ac.uk) |
| EC27403    | <i>BAR, PLGG1</i>     | <i>NOS, PLGG1</i> | EC15325   | This study                |
| EC27404    | <i>BAR, BASS6</i>     | <i>NOS, BASS6</i> | EC15325   | This study                |
| EC27406    | <i>BAR, BASS6</i>     | <i>NOS, PLGG1</i> | EC15325   | This study                |

**Supplemental Table 3.** Yeast Strains Used in this Study.

| <b>Yeast Strains</b>           | <b>Genotype</b>                                                                                                                                                | <b>Reference</b>      |
|--------------------------------|----------------------------------------------------------------------------------------------------------------------------------------------------------------|-----------------------|
| BY4741                         | <i>MAT<math>\alpha</math> his3<math>\Delta</math> leu2<math>\Delta</math>0 LYS2 met15<math>\Delta</math>0 ura3<math>\Delta</math>0</i>                         | GE Open<br>biosystems |
| <i>ady2<math>\Delta</math></i> | <i>MAT<math>\alpha</math> his3<math>\Delta</math> leu2<math>\Delta</math>0 LYS2 met15<math>\Delta</math>0 ura3<math>\Delta</math>0 ady2<math>\Delta</math></i> | GE Open<br>Biosystems |
