# Supplementary material
Source: PubMed Central journal article supplement (PMC5435425)
Supplement: supp_tpc.16.00775_TPC2016-00775-RAR1_tpc00775_SupplementalFile1.pdf [file supp_tpc.16.00775_TPC2016-00775-RAR1_tpc00775_SupplementalFile1.pdf]

**Supplemental File 1. ANOVA Tables.**

|                              | Sum of squares | Degrees of freedom | Mean Squares | F-Value | P-Value >F |
|------------------------------|----------------|--------------------|--------------|---------|------------|
| <b>Figure 2C</b>             |                |                    |              |         |            |
| Model                        | 0.02           | 2                  | 0.01         | 27.95   | 2.64E-7    |
| Error                        | 0.01           | 27                 | 3.73E-4      |         |            |
| Total                        | 0.03           | 29                 |              |         |            |
| <b>Figure 3A</b>             |                |                    |              |         |            |
| <b>(A)</b>                   |                |                    |              |         |            |
| Model                        | 51.27          | 2                  | 25.63        | 19.75   | 1.59E-4    |
| Error                        | 15.57          | 12                 | 1.29         |         |            |
| Total                        | 66.84          | 14                 |              |         |            |
| <b>(C<sub>i</sub>)</b>       |                |                    |              |         |            |
| Model                        | 1573.77        | 2                  | 786.88       | 0.95    | 0.41       |
| Error                        | 9842.03        | 12                 | 820.16       |         |            |
| Total                        | 11415.81       | 14                 |              |         |            |
| <b>(g<sub>s</sub>)</b>       |                |                    |              |         |            |
| Model                        | 0.007          | 2                  | 0.003        | 0.48    | 0.62       |
| Error                        | 0.086          | 12                 | 0.007        |         |            |
| Total                        | 0.093          | 14                 |              |         |            |
| <b>Figure 3B and Table 1</b> |                |                    |              |         |            |
| <b>(V<sub>c max</sub>)</b>   |                |                    |              |         |            |
| Model                        | 704.78         | 2                  | 352.39       | 49.21   | 1.42E-5    |
| Error                        | 64.44          | 9                  | 7.16         |         |            |
| Total                        | 769.23         | 11                 |              |         |            |
| <b>(J<sub>max</sub>)</b>     |                |                    |              |         |            |
| Model                        | 1036.12        | 2                  | 518.06       | 25.10   | 2.08E-4    |
| Error                        | 185.74         | 9                  | 20.63        |         |            |
| Total                        | 1221.87        | 11                 |              |         |            |
| <b>(R<sub>d</sub>)</b>       |                |                    |              |         |            |
| Model                        | 1.79           | 2                  | 0.89         | 5.54    | 0.02       |
| Error                        | 1.45           | 9                  | 0.16         |         |            |
| Total                        | 3.25           | 11                 |              |         |            |
| <b>(g<sub>s</sub>)</b>       |                |                    |              |         |            |
| Model                        | 0.003          | 2                  | 0.001        | 0.73    | 0.50       |
| Error                        | 0.019          | 9                  | 0.002        |         |            |
| Total                        | 0.022          | 11                 |              |         |            |
| <b>Figure 5B</b>             |                |                    |              |         |            |
| Model                        | 0.171          | 3                  | 0.06         | 108.26  | 5.90E-9    |
| Error                        | 0.006          | 12                 | 5.29E-4      |         |            |
| Total                        | 0.178          | 15                 |              |         |            |

**Figure 5C**

|       |       |    |          |       |         |
|-------|-------|----|----------|-------|---------|
| Model | 0.021 | 3  | 0.007    | 50.17 | 1.17E-8 |
| Error | 0.002 | 17 | 1.451E-4 |       |         |
| Total | 0.024 | 20 |          |       |         |

**Figure 5D**

|           |         |    |         |        |          |
|-----------|---------|----|---------|--------|----------|
| Genotype  | 238.48  | 3  | 79.49   | 29.16  | 1.08E-11 |
| Treatment | 2221.90 | 1  | 2221.90 | 815.04 | 0        |
| Model     | 2557.39 | 4  | 639.34  | 234.52 | 0        |
| Error     | 160.84  | 59 | 2.72    |        |          |
| Total     | 2718.24 | 63 |         |        |          |

**Figure 6**

(Glycolate)

|           |        |    |           |       |         |
|-----------|--------|----|-----------|-------|---------|
| Genotype  | 5.95E6 | 3  | 1.98E6    | 13.05 | 7.33E-5 |
| Treatment | 2.65E6 | 1  | 2.65E6    | 17.46 | 5.08E-4 |
| Model     | 8.60E6 | 4  | 2.15E6    | 14.16 | 1.61E-5 |
| Error     | 2.88E6 | 19 | 151925.39 |       |         |
| Total     | 1.14E7 | 23 |           |       |         |

(Glyoxylate)

|           |          |    |        |       |         |
|-----------|----------|----|--------|-------|---------|
| Genotype  | 240.51   | 3  | 80.17  | 2.32  | 0.10    |
| Treatment | 992.92   | 1  | 992.92 | 28.84 | 3.49E-5 |
| Model     | 1233.43  | 4  | 308.35 | 8.95  | 3.05E-4 |
| Error     | 654.07   | 19 | 34.42  |       |         |
| Total     | 1887.514 | 23 |        |       |         |

(Glycine)

|           |           |    |           |       |         |
|-----------|-----------|----|-----------|-------|---------|
| Genotype  | 88995.27  | 3  | 29665.09  | 6.36  | 0.003   |
| Treatment | 195463.45 | 1  | 195463.45 | 41.96 | 3.30E-6 |
| Model     | 284458.72 | 4  | 71114.68  | 15.26 | 9.58E-6 |
| Error     | 88507.41  | 19 | 4658.28   |       |         |
| Total     | 372966.13 | 23 |           |       |         |

(Serine)

|           |          |    |          |       |         |
|-----------|----------|----|----------|-------|---------|
| Genotype  | 17651.14 | 3  | 5883.71  | 10.14 | 3.30E-4 |
| Treatment | 21021.92 | 1  | 21021.92 | 36.24 | 8.59E-6 |
| Model     | 38673.06 | 4  | 9668.26  | 16.67 | 5.12E-6 |
| Error     | 11019.15 | 19 | 579.95   |       |         |
| Total     | 49692.21 | 23 |          |       |         |

(Hydroxypyruvate)

|           |        |    |       |      |      |
|-----------|--------|----|-------|------|------|
| Genotype  | 88.79  | 3  | 29.59 | 3.40 | 0.03 |
| Treatment | 17.00  | 1  | 17.00 | 1.95 | 0.17 |
| Model     | 105.79 | 4  | 26.44 | 3.04 | 0.04 |
| Error     | 165.27 | 19 | 8.69  |      |      |
| Total     | 271.07 | 23 |       |      |      |

(Glycerate)

|           |        |   |        |       |         |
|-----------|--------|---|--------|-------|---------|
| Genotype  | 6.87E7 | 3 | 2.29E7 | 15.62 | 2.30E-5 |
| Treatment | 2.74E7 | 1 | 2.74E7 | 18.73 | 3.62E-4 |

|       |        |    |        |       |         |
|-------|--------|----|--------|-------|---------|
| Model | 9.61E7 | 4  | 2.40E7 | 16.39 | 5.76E-6 |
| Error | 2.78E7 | 19 | 1.46E6 |       |         |
| Total | 1.24E8 | 23 |        |       |         |

**Figure 7**

(Glycerate T0)

|       |        |    |        |       |       |
|-------|--------|----|--------|-------|-------|
| Model | 1.68E9 | 3  | 5.61E8 | 12.43 | 0.002 |
| Error | 3.61E8 | 8  | 4.51E7 |       |       |
| Total | 2.04E9 | 11 |        |       |       |

(Glycerate T10)

|       |        |    |        |       |         |
|-------|--------|----|--------|-------|---------|
| Model | 3.38E9 | 3  | 1.12E9 | 39.87 | 3.70E-5 |
| Error | 2.26E8 | 8  | 2.82E7 |       |         |
| Total | 3.61E9 | 11 |        |       |         |

(Glycerate T30)

|       |        |    |        |       |       |
|-------|--------|----|--------|-------|-------|
| Model | 1.80E9 | 3  | 6.01E8 | 12.32 | 0.002 |
| Error | 3.90E8 | 8  | 4.88E7 |       |       |
| Total | 2.19E9 | 11 |        |       |       |

(Glycerate T60)

|       |        |    |        |       |         |
|-------|--------|----|--------|-------|---------|
| Model | 9.41E8 | 3  | 3.13E8 | 18.99 | 5.36E-4 |
| Error | 1.32E8 | 8  | 1.65E7 |       |         |
| Total | 1.07E9 | 11 |        |       |         |

(Glycolate T0)

|       |          |    |          |       |      |
|-------|----------|----|----------|-------|------|
| Model | 29916.10 | 3  | 29916.10 | 19.47 | 0.01 |
| Error | 6144.87  | 8  | 1536.21  |       |      |
| Total | 36060.97 | 11 |          |       |      |

(Glycolate T10)

|       |           |    |           |       |         |
|-------|-----------|----|-----------|-------|---------|
| Model | 887238.20 | 3  | 295746.06 | 20.77 | 3.92E-4 |
| Error | 113892.60 | 8  | 14236.57  |       |         |
| Total | 1.00E6    | 11 |           |       |         |

(Glycolate T30)

|       |           |    |          |      |      |
|-------|-----------|----|----------|------|------|
| Model | 84257.66  | 3  | 28085.88 | 4.61 | 0.03 |
| Error | 48675.11  | 8  | 6084.38  |      |      |
| Total | 132932.78 | 11 |          |      |      |

(Glycolate T60)

|       |           |    |          |      |      |
|-------|-----------|----|----------|------|------|
| Model | 71461.82  | 3  | 23820.60 | 5.30 | 0.02 |
| Error | 35929.13  | 8  | 4491.14  |      |      |
| Total | 107390.95 | 11 |          |      |      |

(Glycine T0)

|       |           |    |          |       |       |
|-------|-----------|----|----------|-------|-------|
| Model | 3.06E6    | 3  | 3.06E6   | 58.57 | 0.001 |
| Error | 209595.07 | 8  | 52398.76 |       |       |
| Total | 3.27E6    | 11 |          |       |       |

(Glycine T10)

|                  |           |    |           |       |         |
|------------------|-----------|----|-----------|-------|---------|
| Model            | 2.72E7    | 3  | 9.07E6    | 10.17 | 0.004   |
| Error            | 7.13E6    | 8  | 892420.67 |       |         |
| Total            | 3.43E7    | 11 |           |       |         |
| (Glycine T30)    |           |    |           |       |         |
| Model            | 4.61E6    | 3  | 1.53E6    | 4.84  | 0.03    |
| Error            | 2.53E6    | 8  | 317319.03 |       |         |
| Total            | 7.15E6    | 11 |           |       |         |
| (Glycine T60)    |           |    |           |       |         |
| Model            | 3.73E6    | 3  | 1.24E6    | 22.47 | 2.97E-4 |
| Error            | 443580.34 | 8  | 55447.54  |       |         |
| Total            | 4.18E6    | 11 |           |       |         |
| <b>Figure 8B</b> |           |    |           |       |         |
| Model            | 9.64E6    | 5  | 1.92E6    | 5.79  | 0.001   |
| Error            | 6.65E6    | 20 | 332902.00 |       |         |
| Total            | 1.63E7    | 25 |           |       |         |
| <b>Figure 9A</b> |           |    |           |       |         |
| ( <i>BASS6</i> ) | 2.72      | 2  | 1.36      | 79.04 | 4.88E-5 |
| Model            | 0.10      | 6  | 0.01      |       |         |
| Error            | 2.82      | 8  |           |       |         |
| Total            | 38.57     | 2  | 19.28     | 16.91 | 0.003   |
| ( <i>PLGG1</i> ) | 6.84      | 6  | 1.14      |       |         |
| Model            | 45.41     | 8  |           |       |         |
| Error            |           |    |           |       |         |
| Total            |           |    |           |       |         |
| <b>Figure 9B</b> |           |    |           |       |         |
| Model            | 0.012     | 7  | 0.001     | 13.50 | 1.21E-5 |
| Error            | 0.002     | 16 | 1.34E-4   |       |         |
| Total            | 0.014     | 23 |           |       |         |

---
